# Supplementary material
Source: PubMed Central journal article supplement (PMC3565461)
Supplement: NIHMS435366-supplement-01.pdf [file NIHMS435366-supplement-01.pdf]

Table S1: List and details of the antibodies used for immunohistochemistry (IHC)

| Primary Antibody                   | Dilution | Host-type                 | Specificity                                       | References | Secondary Antibody                                      |
|------------------------------------|----------|---------------------------|---------------------------------------------------|------------|---------------------------------------------------------|
| Diaminobenzidine (DAB) IHC         |          |                           |                                                   |            |                                                         |
| Anti-BrdU<br>[Accurate; OBT0030CX] | 1:1000   | Rat IgG-<br>monoclonal    | BrdU in single-stranded DNA                       | (1)        | Biotinylated anti-rat IgG (H+L)<br>[Vector; BA-9500]    |
| Anti-Ki67<br>[Vector; VP-K451]     | 1:5000   | Rabbit IgG-<br>polyclonal | multiple epitopes of Ki67                         | (2)        | Biotinylated anti-rabbit IgG (H+L)<br>[Vector; BA-1000] |
| Fluorescent IHC                    |          |                           |                                                   |            |                                                         |
| Anti-BrdU<br>[Accurate; OBT0030CX] | 1:150    | Rat IgG-<br>monoclonal    | BrdU in single-stranded DNA                       | (1)        | Cy3 donkey anti-rat<br>[JacksonImmuno; 712-165-150]     |
| Anti-NeuN<br>[Millipore; MAB377]   | 1:100    | Mouse IgG-<br>monoclonal  | 3 isotopes: (1) 46 kDA, (2) 46<br>kDA, (3) 48 kDA | (1, 3)     | Cy5 donkey anti-mouse<br>[JacksonImmuno; 715-175-151]   |

Note: All primary antibodies were incubated at 4 °C. The biotinylated secondary antibodies were used at a concentration of 1:300 and the dilutions for Cy3 and Cy5 were 1:250 and 1:200, respectively. All secondary antibodies were incubated at 23 °C for 2 h.

## References

1. Fowler CD, Liu Y, Ouimet C, Wang Z (2002): The effects of social environment on adult neurogenesis in the female prairie vole. *J Neurobiol* 51: 115-128.
2. Schluter C, Duchrow M, Wohlenberg C, Becker MH, Key G, Flad HD, *et al.* (1993): The cell proliferation-associated antigen of antibody Ki-67: a very large, ubiquitous nuclear protein with numerous repeated elements, representing a new kind of cell cycle-maintaining proteins. *J Cell Biol* 123: 513-522.
3. Mullen RJ, Buck CR, Smith AM (1992): NeuN, a neuronal specific nuclear protein in vertebrates. *Development* 116: 201-211.

Table S2: Stereological quantification parameters

| <b>Brain Area</b>         | <b># of Sections</b> | <b>Counting Frame (in <math>\mu\text{m}</math>)</b> | <b>Grid (in <math>\mu\text{m}</math>)</b> | <b>Paxinos &amp; Watson Plate #</b> |
|---------------------------|----------------------|-----------------------------------------------------|-------------------------------------------|-------------------------------------|
| Amygdala                  | 4                    | 50 x 50                                             | 71 x 71                                   | 27 – 33                             |
| Hippocampus               | 5                    | 30 x 30                                             | 43 x 43                                   | 29 – 35                             |
| Medial preoptic area      | 4                    | 35 x 35                                             | 50 x 50                                   | 19 – 23                             |
| Ventromedial hypothalamus | 4                    | 30 x 30                                             | 43 x 43                                   | 29 – 34                             |

Note: The average mounted section thickness was determined to be approximately 22  $\mu\text{m}$  and the optical dissector height was set to 15  $\mu\text{m}$ . The average *Gundersen coefficient of error* was less than 0.2 across all brain regions.
